# Supplementary material for: Elevated CLOCK and BMAL1 Contribute to the Impairment of Aerobic Glycolysis from Astrocytes in Alzheimer’s Disease
Source: PubMed Central journal article supplement (PMC7660350; doi:10.3390/ijms21217862), 2020-10-23
Supplement: ijms-21-07862-s001.pdf [file ijms-21-07862-s001.pdf]

**Supplemental information**

**Elevated CLOCK and BMAL1 contributes to the  
impairment of aerobic glycolysis from astrocytes  
in Alzheimer's diseases.**

**Ik Dong Yoo <sup>1</sup>, Min Woo Park <sup>2</sup>, Hyeon Woo Cha <sup>2</sup>, Sunmi Yoon <sup>3</sup>, Napissara  
Boonpraman <sup>3</sup>, Sun Shin Yi <sup>3\*</sup>, and Jong-Seok Moon <sup>2\*</sup>**

**Supplemental Table S1.** The characteristics of patients with AD and non-AD donor (normal).

|                         | <b>Normal</b><br><b>(n= 3)</b> | <b>AD</b><br><b>(n= 3)</b> |
|-------------------------|--------------------------------|----------------------------|
| <b>Age, years</b>       | 65 ± 16                        | 72 ± 11                    |
| <b>Sex, male/female</b> | 2 / 1                          | 0 / 3                      |
| <b>Brain weight (g)</b> | 1300 – 1400                    | 848 – 928                  |

# Figure S1

**A**

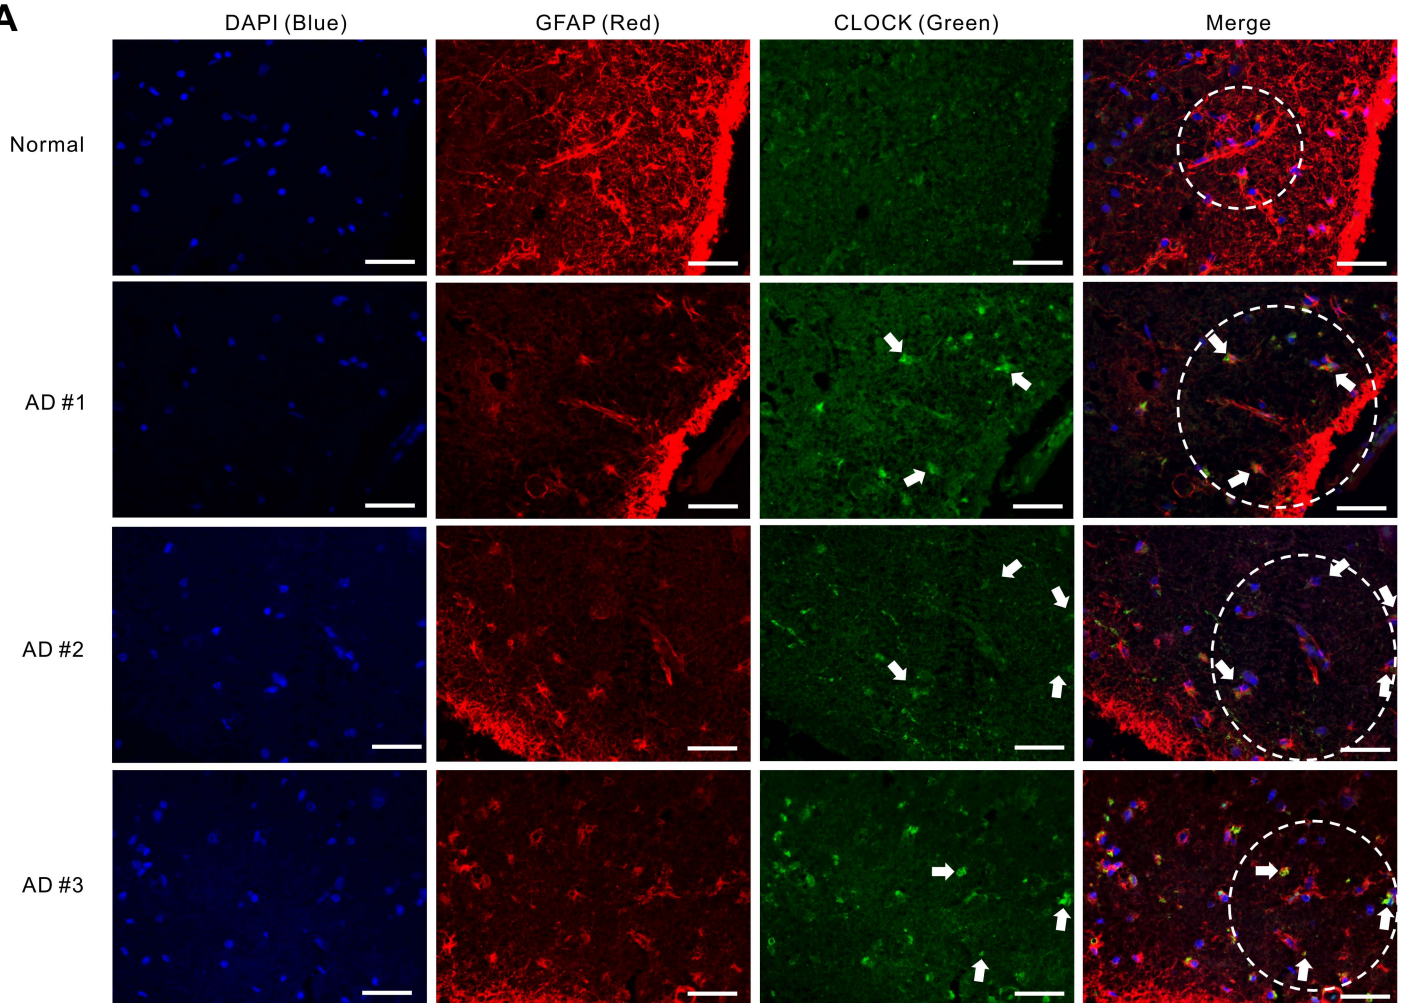

**B**

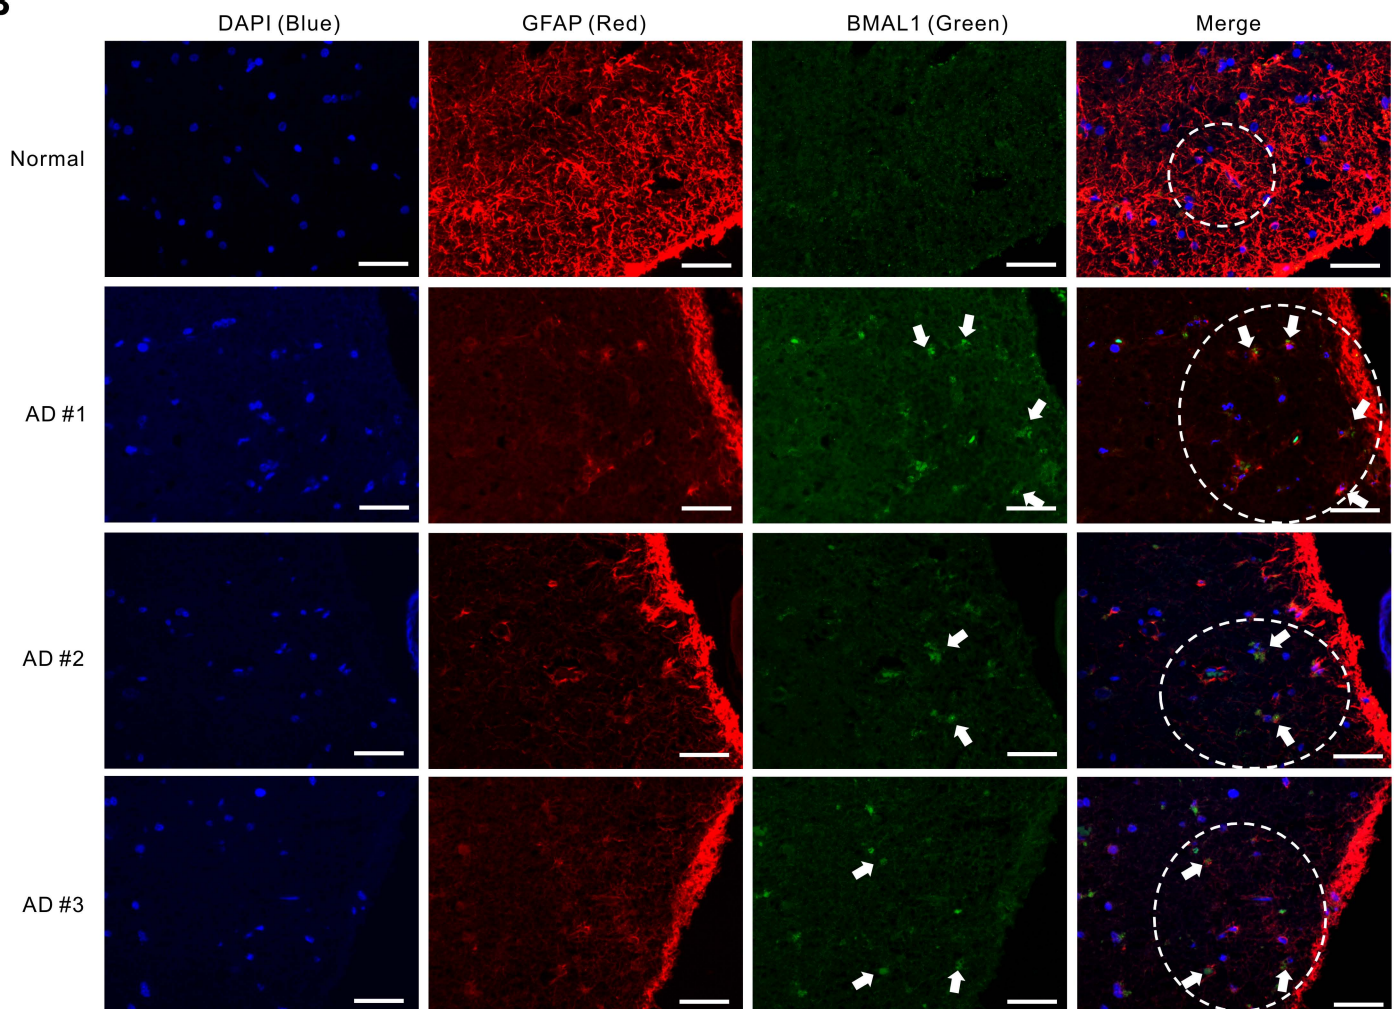

**Supplemental Figure S1. The levels of CLOCK and BMAL1 are elevated in impaired astrocytes in cerebral cortex region from patients with Alzheimer's diseases.** (A) Representative immunofluorescence images of CLOCK expression in cerebral cortex region from patients with AD (AD) or non-AD (normal) showing CLOCK (green) in astrocytes expressing the astrocytes marker GFAP (red) around vessels. DAPI-stained nuclei are shown in blue. Scale bars, 20  $\mu$ M. (B) Representative immunofluorescence images of BMAL1 expression in cerebral cortex region from patients with AD (AD) or non-AD (normal) showing BMAL1 (green) in astrocytes expressing the astrocytes marker GFAP (red) around vessels. DAPI-stained nuclei are shown in blue. Scale bars, 20  $\mu$ M.

## Figure S2

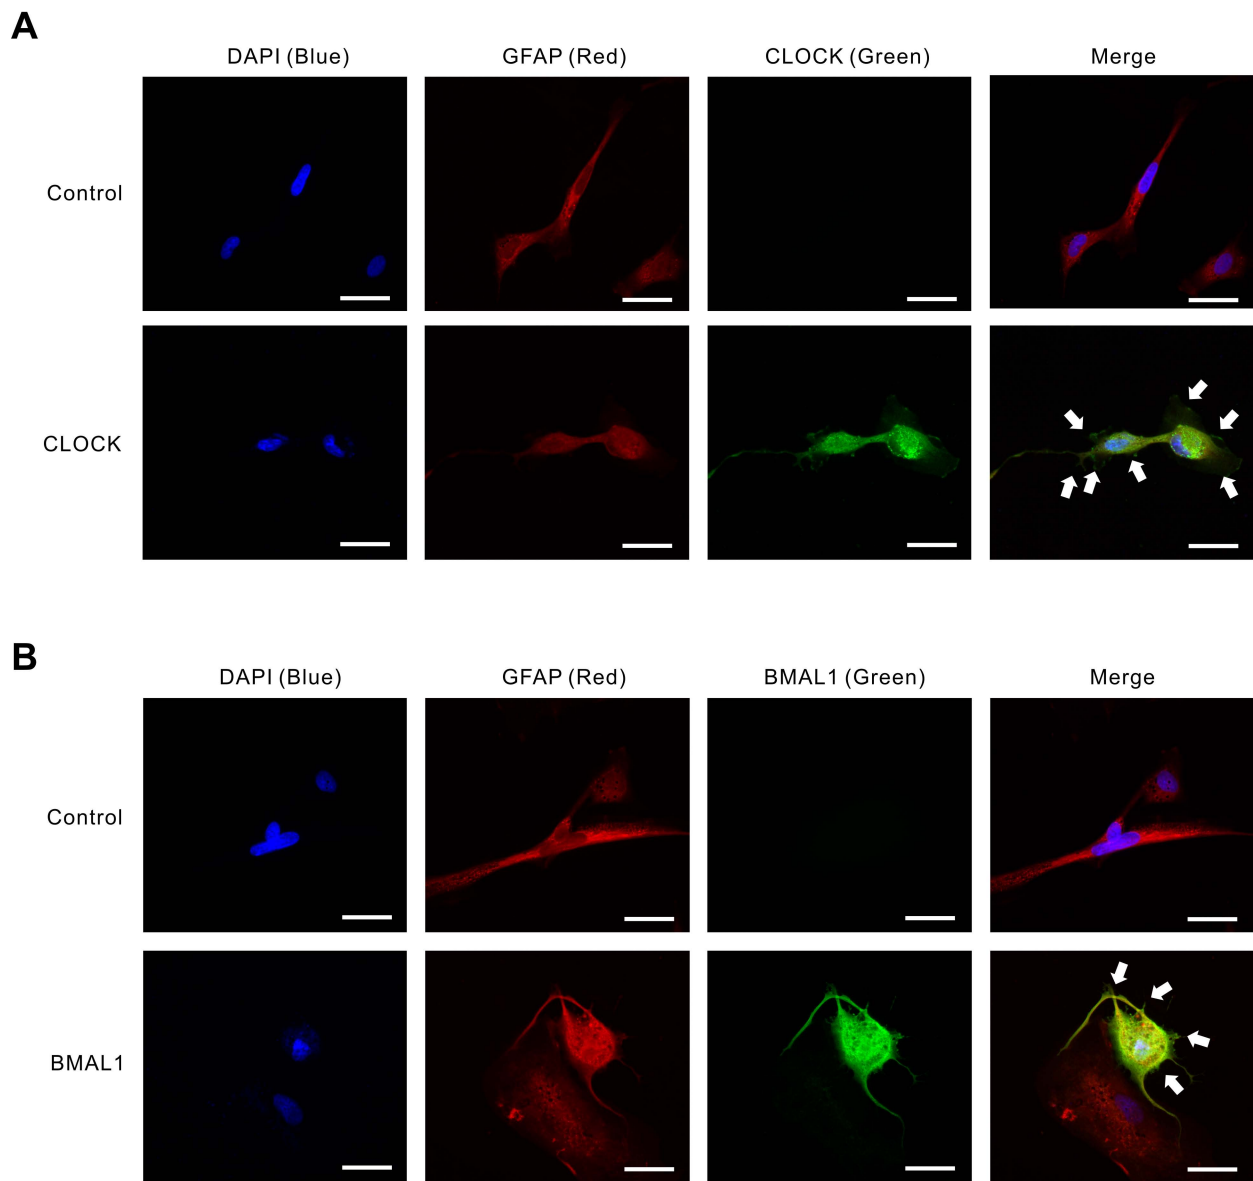

**Supplemental Figure S2. The elevation of CLOCK and BMAL1 contributes to the functional impairment by reduction of GFAP-positive filaments in human astrocytes.** (A) Representative immunofluorescence images of CLOCK expression in control and CLOCK overexpressing (CLOCK) human astrocytes showing CLOCK (green) and GFAP (red). DAPI-stained nuclei are shown in blue. Scale bars, 20  $\mu$ M. (B) Representative immunofluorescence images of BMAL1 expression in control and BMAL1 overexpressing (BMAL1) human astrocytes showing BMAL1 (green) and GFAP (red). DAPI-stained nuclei are shown in blue. Scale bars, 20  $\mu$ M.
